# Supplementary material for: Professional roles of general practitioners, community pharmacists and specialist providers in collaborative medication deprescribing - a qualitative study
Source: PubMed Central journal article supplement (PMC7487755; doi:10.1186/s12875-020-01255-1), 2020-09-04
Supplement: 12875_2020_1255_MOESM1_ESM.pdf [file 12875_2020_1255_MOESM1_ESM.pdf]

## Supplemental material

Topic guide for focus group discussions

### Provision of case vignette:

‘84-year old male patient, lusty, many clinical conditions and drugs (about 10). Patient is a typical case of less medication being desirable, and you think about deprescribing.’

| Target information                                    | Possible questions                                                                                                                                                                                                                                                                                                                                            |
|-------------------------------------------------------|---------------------------------------------------------------------------------------------------------------------------------------------------------------------------------------------------------------------------------------------------------------------------------------------------------------------------------------------------------------|
| <b>1. Experiences and attitudes deprescribing</b>     | Which experiences do you have with deprescribing of medication?<br><br>What are the challenges in deprescribing?                                                                                                                                                                                                                                              |
| <b>2. Motivation and situations for deprescribing</b> | What is leading you to think about deprescribing medication?                                                                                                                                                                                                                                                                                                  |
| <b>a. Trigger situations</b>                          | What if the patient in the vignette would...<br><br>... be in residence care home?<br>... be discharged from hospital?<br>... get a palliative diagnosis?<br>... consult you for a trivial reason like cough or DMP?                                                                                                                                          |
| <b>b. Patient characteristics</b>                     | Would the case (vignette) differ if the patient was demented or in need of care?<br><br>Are there other patient characteristics that influence your decision?                                                                                                                                                                                                 |
| <b>c. Reasons /Motivation</b>                         | What motives/reasons do you have for deprescribing?                                                                                                                                                                                                                                                                                                           |
| <b>d. Initiative</b>                                  | Who is taking initiative on deprescribing? You, the patient or others?                                                                                                                                                                                                                                                                                        |
| <b>3. Heuristics (rules of thumb)</b>                 | What do you think when seeing such a long list of drugs? (on flipchart)<br>What considerations do you undertake?                                                                                                                                                                                                                                              |
| <b>4. Substance groups</b>                            | In case vignette: which medicines would you deprescribe? Is there a difference in deprescribing allopurinol or simvastatin/ASA? Why?                                                                                                                                                                                                                          |
| <b>a. Risk-benefit weighting</b>                      | What do you consider and weigh? Risk/benefit?                                                                                                                                                                                                                                                                                                                 |
| <b>5. Emotions</b>                                    | We would like to hear about your feelings in deprescribing decisions. Do they play a role? How do you cope with doubts and fears?<br><br>Provocative: What if you learned that the patient, after your deprescribing, had suffered an adverse event (e.g. apoplexy after ASA)?<br><br>Do you consider/fear suchlike? What would help you in these situations? |

|                                                   |                                                                                                                                                                                                                              |
|---------------------------------------------------|------------------------------------------------------------------------------------------------------------------------------------------------------------------------------------------------------------------------------|
| <b>6. Doctor-patient interaction</b>              | <p>If you consider it possible for medical reasons to deprescribe a drug: to what extent do you include the patient in that decision?</p> <p>What are your experiences with that?</p>                                        |
| <b>a. Interaction with other stakeholders</b>     | <p>Who is responsible for a patient's drugs?</p> <p>Do you have contact with other practitioners in this matter? Specialists? Pharmacists? Care-givers?</p> <p>What should contact look like? Who should be responsible?</p> |
| <b>b. Risk-Benefit</b>                            | <p>Do you discuss the pros and cons of deprescribing a medication with the patient?</p>                                                                                                                                      |
| <b>c. Conflicts</b>                               | <p>What happens in case of diverging views between stakeholders on deprescribing? What happens if the patient expresses doubts or fear?</p>                                                                                  |
| <b>7. Implementation of deprescribing attempt</b> | <p>Imaging the decision of deprescribing had been made (case of e.g. citalopram or allopurinol).</p> <p>How in detail would you proceed practically?</p>                                                                     |
| <b>a. Safety-netting</b>                          | <p>Would you monitor the patient post-deprescribing? How?</p>                                                                                                                                                                |
| <b>b. Undesired Outcome</b>                       | <p>Do you have strategies for undesired course / outcome of deprescribing attempts?</p>                                                                                                                                      |
| <b>c. Other stakeholders</b>                      | <p>Who is important (helpful/hindering) for implementing the deprescribing approach other than the patient? What experiences do you have in collaboration with other colleagues/ specialists in deprescribing?</p>           |
| <b>8. Wishes</b>                                  | <p>What would facilitate deprescribing approaches for you in future? What do you need? What do you miss?</p>                                                                                                                 |
